# Supplementary material for: Association of HDL Subfraction Profile with the Progression of Insulin Resistance
Source: MDPI journal article supplement (doi:10.3390/ijms241713563), 2023-09-01
Supplement: s1 [file s1]

**Supplementary Table S1.** Nomenclature and physical characteristics of high-density lipoprotein (HDL) cholesterol subfractions according to the separation technique used.

|                                      | Very large HDL<br>(HDL-VL) | Large HDL<br>(HDL-L)                   | Medium (or<br>intermediate)<br>HDL<br>(HDL-M or<br>HDL-I) | Small HDL<br>(HDL-S) | Very small HDL<br>(HDL-VS) |
|--------------------------------------|----------------------------|----------------------------------------|-----------------------------------------------------------|----------------------|----------------------------|
| Density range, g/mL                  | 1.063 – 1.087              | 1.088 – 1.110                          | 1.110 – 1.129                                             | 1.129 – 1.154        | 1.154 – 1.210              |
| Size range, nm                       | 12.9 – 9.7                 | 9.7 – 8.8                              | 8.8 – 8.2                                                 | 8.2 – 7.8            | 7.8 – 7.2                  |
| Density gradient ultracentrifugation | HDL <sub>2b</sub>          | HDL <sub>2a</sub>                      | HDL <sub>3a</sub>                                         | HDL <sub>3b</sub>    | HDL <sub>3c</sub>          |
| Density range, g/mL                  | 1.063 – 1.087              | 1.088 – 1.110                          | 1.110 – 1.129                                             | 1.129 – 1.154        | 1.154 – 1.210              |
| Gradient gel electrophoresis         | HDL <sub>2b</sub>          | HDL <sub>2a</sub>                      | HDL <sub>3a</sub>                                         | HDL <sub>3b</sub>    | HDL <sub>3c</sub>          |
| Size range, nm                       | 12.9 – 9.7                 | 9.7 – 8.8                              | 8.8 – 8.2                                                 | 8.2 – 7.8            | 7.8 – 7.2                  |
| 2-D gel electrophoresis              | $\alpha$ -1                | $\alpha$ -2                            | $\alpha$ -3                                               | $\alpha$ -4          | $\alpha$ -5                |
| Size range, nm                       | 11.2 – 10.8                | 9.4 – 9.0                              | 8.5 – 7.5                                                 | 7.5 – 7.0            | 6.0 – 5.0                  |
| Nuclear magnetic resonance (NMR)     | Large HDL-P                | Medium HDL-P                           |                                                           | Small HDL-P          |                            |
| Size range, nm                       | 12.9 – 9.7                 | 9.7 – 8.8                              | 8.8 – 8.2                                                 | 8.2 – 7.8            | 7.8 – 7.2                  |
| Ion mobility                         | HDL <sub>2b</sub>          | HDL <sub>2a</sub> and HDL <sub>3</sub> |                                                           |                      |                            |
| Size range, nm                       | 14.5 – 10.5                | 10.5 – 7.65                            |                                                           |                      |                            |
| Lipoprint HDL system                 | HDL-L:<br>HDL-1, -2, -3    |                                        | HDL-I:<br>HDL-4, -5, -6, -7                               |                      | HDL-S:<br>HDL-8, -9, -10   |

nm: nanometer, HDL-P: HDL particle
